# Supplementary material for: Role of sulfur in proton-induced collisions of RNA prebiotic precursors
Source: Royal Society of Chemistry journal article supplement (doi:10.1039/c8cp07204c), 2018-12-20

# Role of sulfur in proton-induced collisions of RNA prebiotic precursors

Marie-Christine Bacchus-Montabonel

Univ Lyon, Université Claude Bernard Lyon 1, CNRS, Institut Lumière Matière, F-69622, VILLEURBANNE, France

## Supplementary information

Fig. S1: a) Adiabatic potential energy curves of the  $^1A$  states in the collision of a proton on 2-aminooxazole in the  $z$  direction. Black, entrance channel  $H^+ + 2\text{-aminooxazole}$   $\{\{p_{xy}^N\}^2 \{\pi_2\}^2 \{\pi_{CC}\}^2\}$ ; red, charge transfer channel  $\{\{p_{xy}^N\}^2 \{\pi_2\}^2 \{\pi_{CC}\} 1s_H\}$  with singly excitation to the  $1s_H$  orbital on hydrogen; green, charge transfer channel  $\{\{p_{xy}^N\} \{\pi_2\}^2 \{\pi_{CC}\}^2 1s_H\}$ ; blue, charge transfer channel  $\{\{p_{xy}^N\}^2 \{\pi_2\} \{\pi_{CC}\}^2 1s_H\}$ ; magenta, charge transfer channel  $\{\{p_{xy}^N\} \{\pi_2\}^2 \{\pi_{CC}\} \{\pi_{nb}\} 1s_H\}$ . b) Adiabatic potential energy curves of the  $^1A$  states in the collision of a proton on 2-aminooxazole towards  $C=C$ . Black, entrance channel  $H^+ + 2\text{-aminooxazole}$   $\{\{\pi_2\}^2 \{p_{xy}^N\}^2 \{\pi_{CC}\}^2\}$ ; red, charge transfer channel  $\{\{\pi_2\}^2 \{p_{xy}^N\} \{\pi_{CC}\} 1s_H\}$ ; green, charge transfer channel  $\{\{\pi_2\}^2 \{p_{xy}^N\} \{\pi_{CC}\}^2 1s_H\}$ ; blue, charge transfer channel  $\{\{\pi_2\} \{p_{xy}^N\}^2 \{\pi_{CC}\}^2 1s_H\}$ .

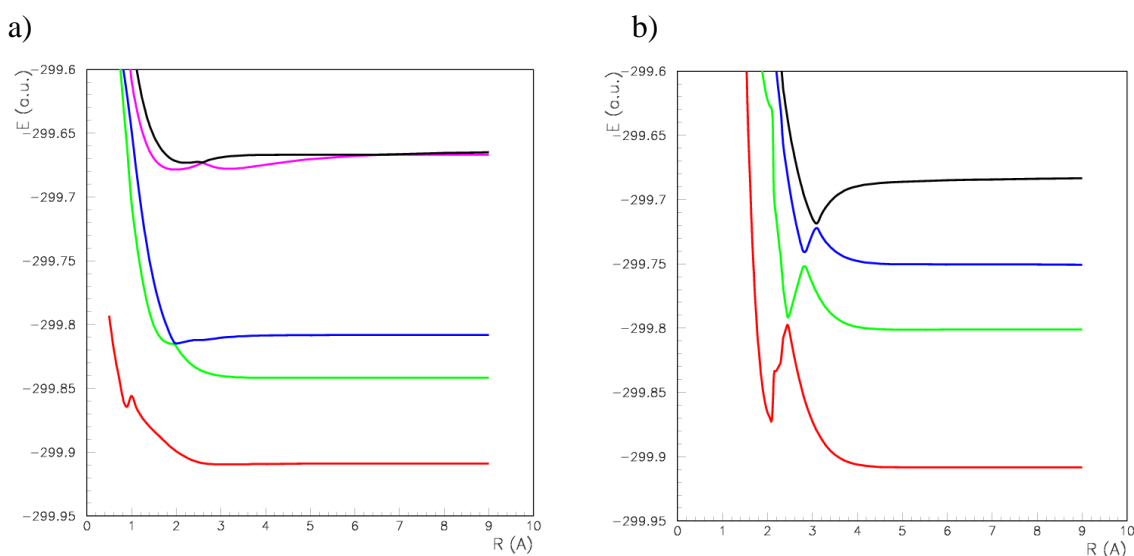

Fig. S2: Main molecular orbitals involved in the charge transfer process in collision of a proton on 2-aminooxazole

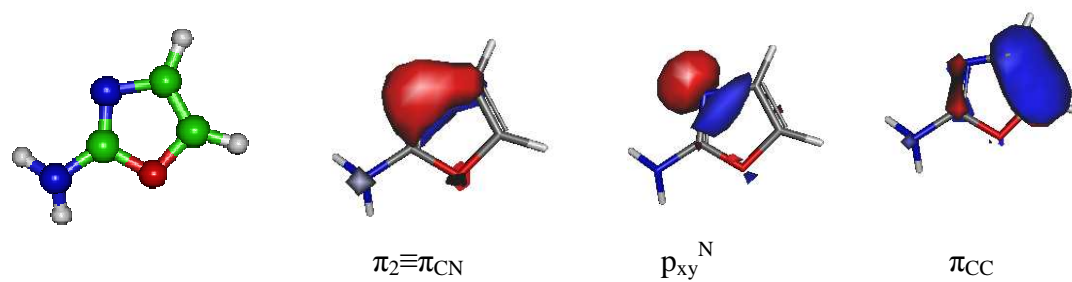

Supplement: c8cp07204c1.pdf [file c8cp07204c1.pdf]
